# Supplementary material for: Maximizing energy efficiency with a mirror-structured hybrid generator leveraging triboelectric and photovoltaic cells for optimal coverage and wind awareness
Source: Royal Society of Chemistry journal article supplement (doi:10.1039/d3ta04540d), 2023-01-01
Supplement: d3ta04540d1.pdf [file d3ta04540d1.pdf]

## Supplementary Information

### Maximizing energy efficiency with a mirror-structured hybrid generator leveraging triboelectric and photovoltaic cells for optimal coverage and wind awareness

Inkyum Kim<sup>a</sup> and Daewon Kim<sup>\*b,c</sup>

---

<sup>a</sup> Department of Electronics and Information Convergence Engineering, Kyung Hee University, 1732 Deogyong-daero, Giheung-gu, Yongin 17104, Republic of Korea.

<sup>b</sup> Department of Electronic Engineering, Kyung Hee University, 1732 Deogyong-daero, Giheung-gu, Yongin 17104, Republic of Korea. E-mail: daewon@khu.ac.kr

<sup>c</sup> Center for BrainTechnology, Korea Institute of Science and Technology, 5, Hwarang-ro 14-gil, Seongbuk-gu, Seoul 02792, Republic of Korea.

## **Table of contents**

- 1. Water contact angle values for the bare Al and bare FEP film**
- 2. Operating mechanism and simulation results of wind TENG**
- 3. Electrical outputs of the PV cell with/without SAM**
- 4. Output voltage profiles with mirror-based PV cell**
- 5. Schematic for the directionality tests with the mirror-based PV cell**
- 6. Effect of SiO<sub>2</sub> powder with increasing the injection number of wind**
- 7. Basic electrical outputs of wind TENG**
- 8. Durability test for the wind-TENG with continuous wind input**
- 9. Wind sensing application with weak, middle, and strong-intensity**
- 10. Video of wind sensing application with weak input**
- 11. Video of wind sensing application with middle input**
- 12. Video of wind sensing application with strong input**

## 1. Water contact angle values for the bare Al and bare FEP film

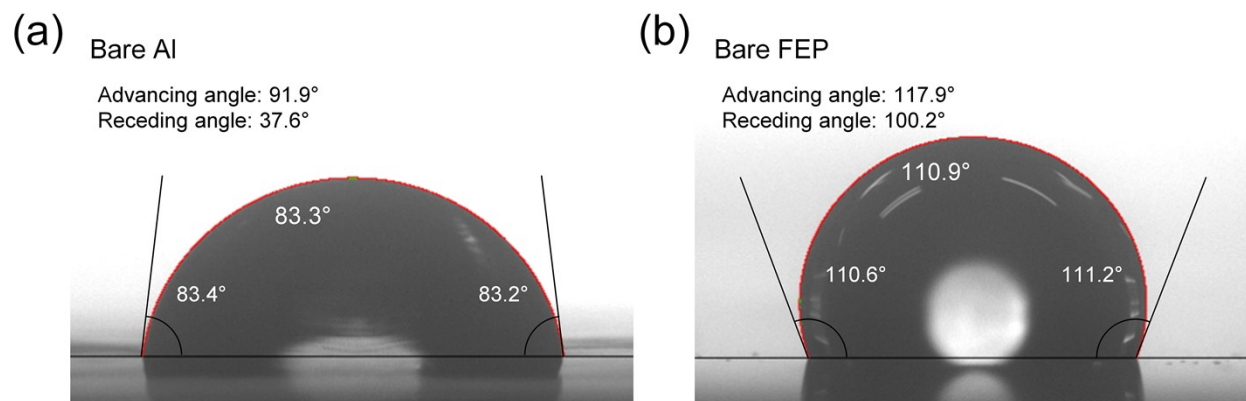

Fig. S1 Results of the contact angle measurement with (a) bare Al and (b) bare FEP film-cases.

## 2. Operating mechanism and simulation results of wind TENG

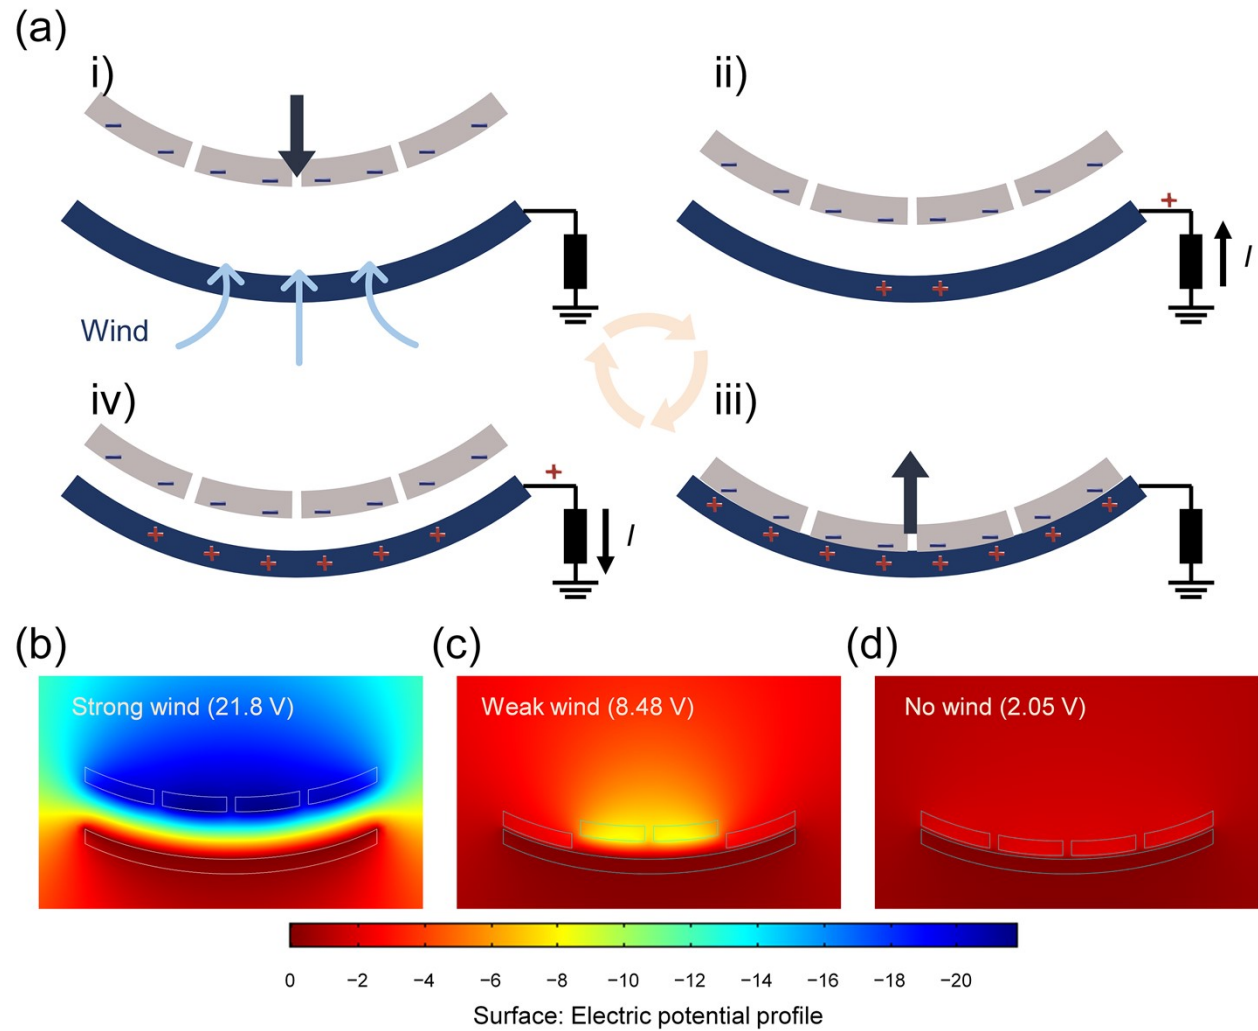

Fig. S2 Operating mechanism and finite element method (FEM) results of the wind TENG. (a) Detailed operating mechanism. FEM results with (b) the strong wind-condition, (c) weak wind-condition, and (d) without wind-input.

### 3. Electrical outputs of the PV cell with/without SAM

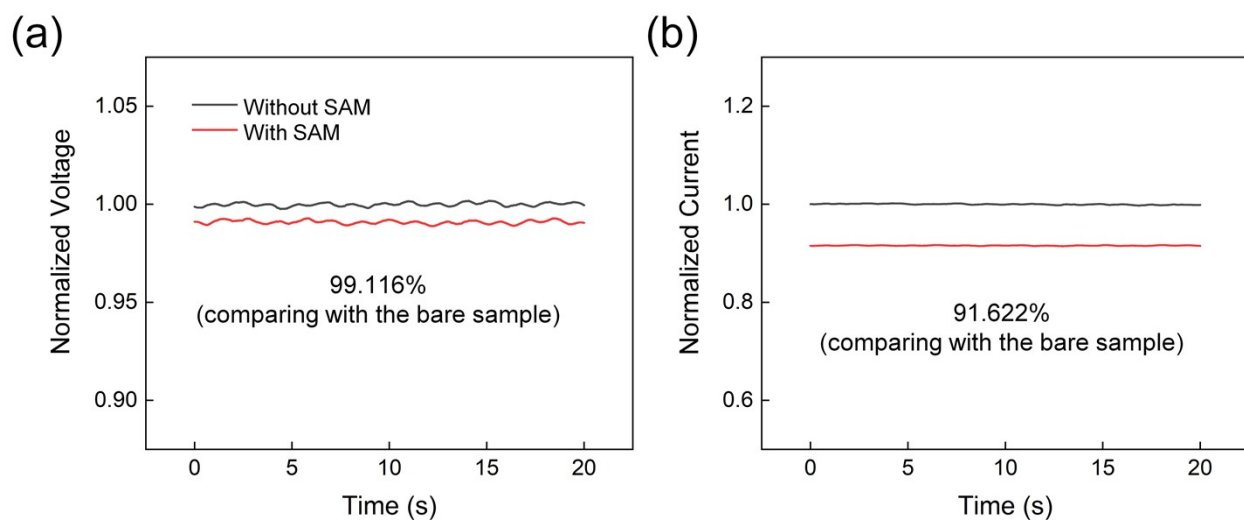

Fig. S3 (a) Normalized voltage and (b) normalized current signals generated from the PV cell with/without the self-assembled monolayer on the Al mirror layer.

#### 4. Output voltage profiles with mirror-based PV cell

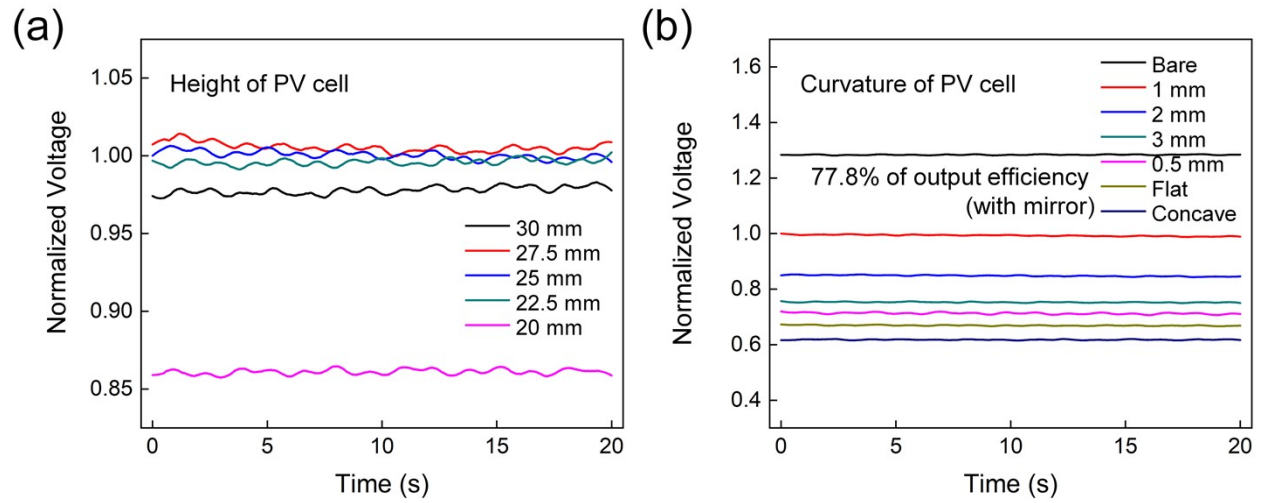

Fig. S4 Values of output voltage from the PV cell with changing conditions. (a) Changing the height of the PV cell. (b) Changing the curvature of the PV cell.

## 5. Schematic for the directionality tests with the mirror-based PV cell

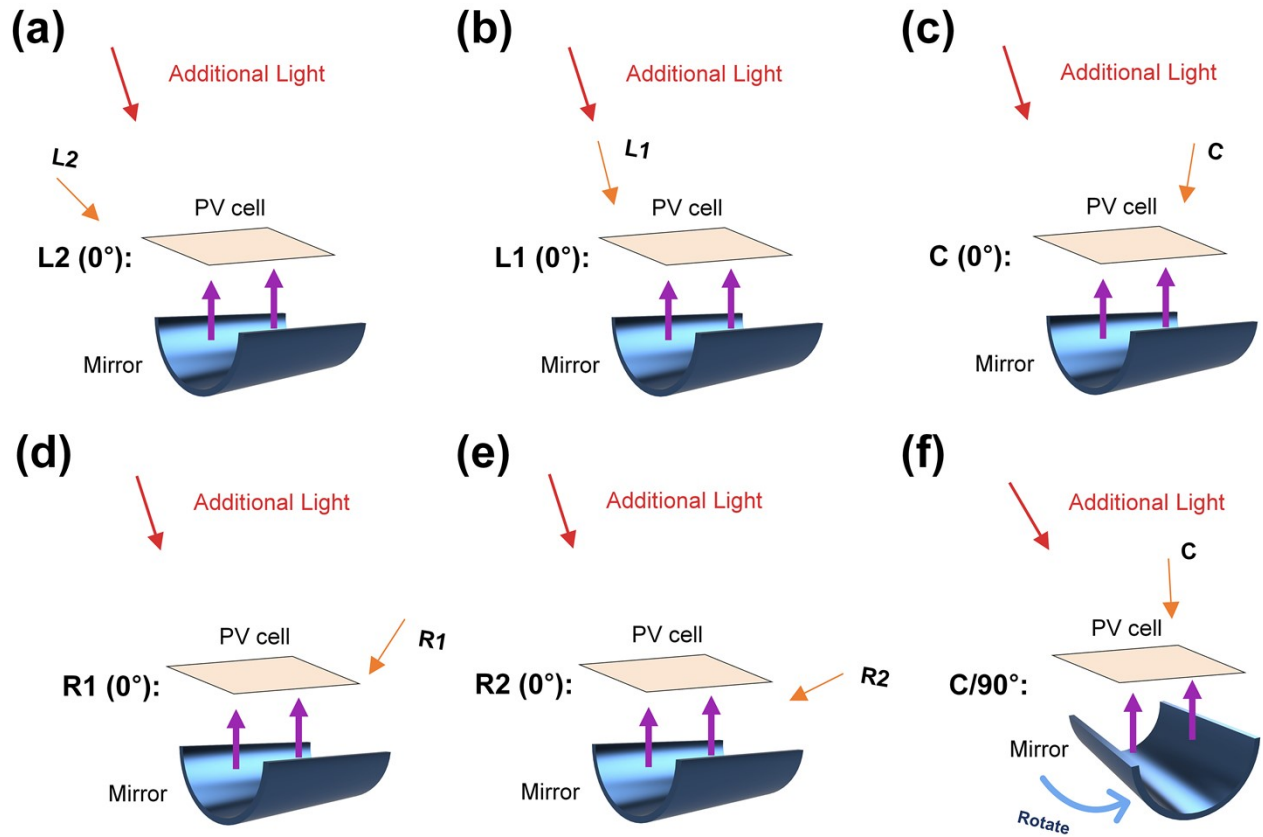

Fig. S5 Schematic diagram for elucidating the measuring condition for checking the directionality with (a) L2, (b) L1, (c) C, (d) R1, (e) R2, and (f) C/90°-cases.

## 6. Effect of SiO<sub>2</sub> powder with increasing the injection number of wind

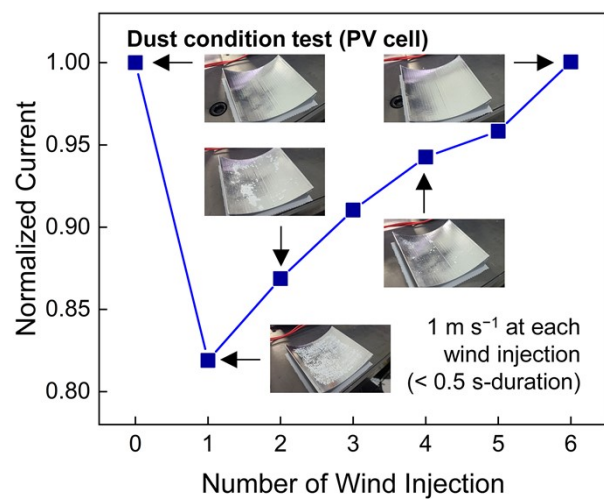

Fig. S6 Normalized current values of the PV cell with adding the SiO<sub>2</sub> powder and increasing the injection number of the input wind.

## 7. Basic electrical outputs of wind TENG

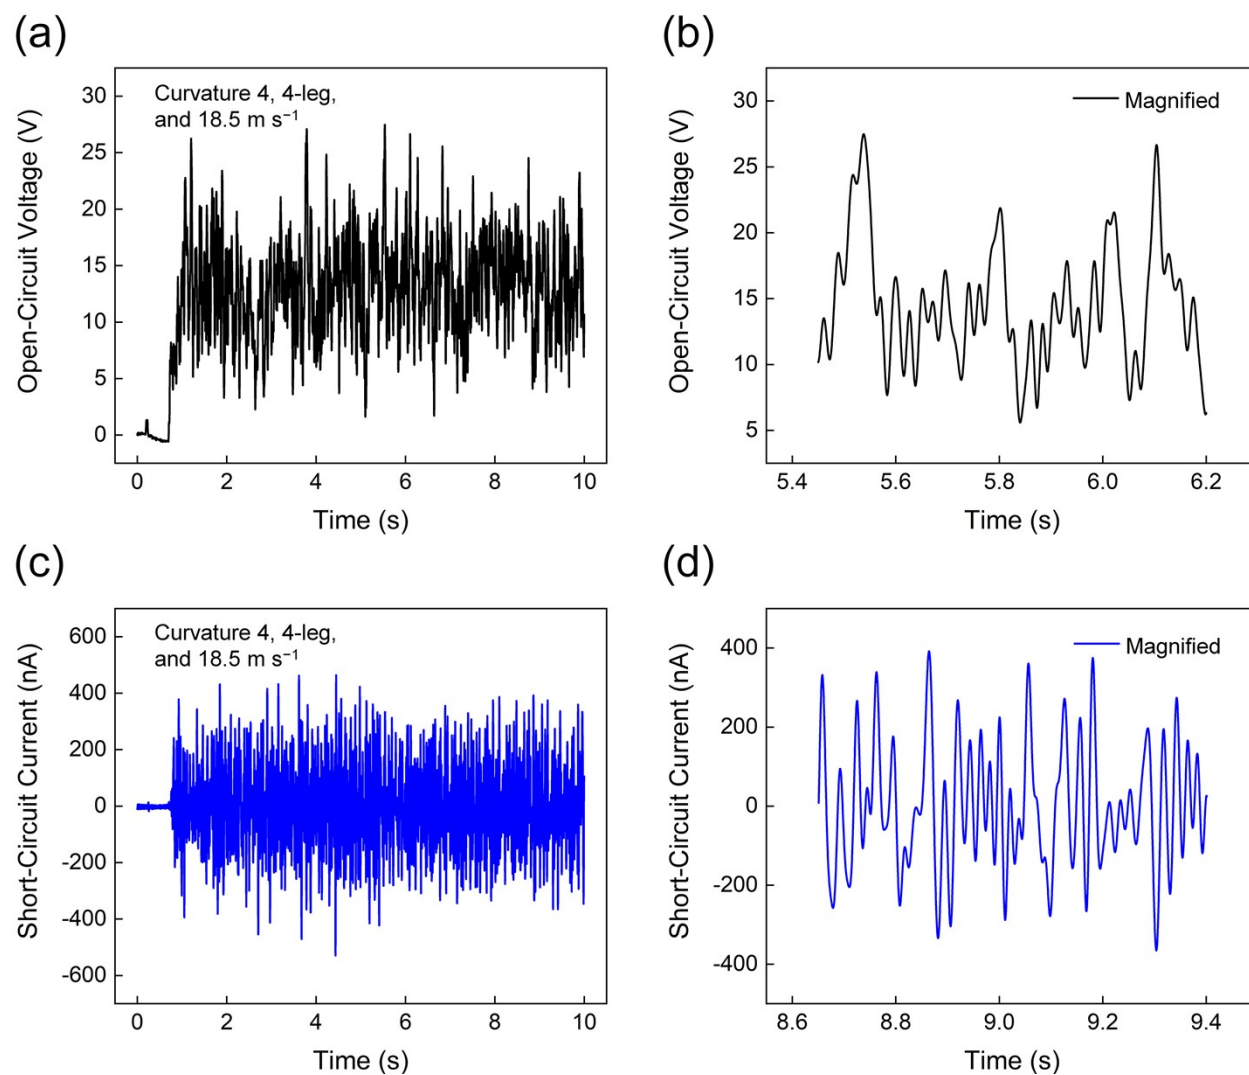

Fig. S7 Basic electrical outputs with magnified peaks of wind TENG. (a)  $V_{OC}$  and (b) its magnified peak. (c)  $I_{SC}$  and (d) its magnified peak.

## 8. Durability test for the wind-TENG with continuous wind input

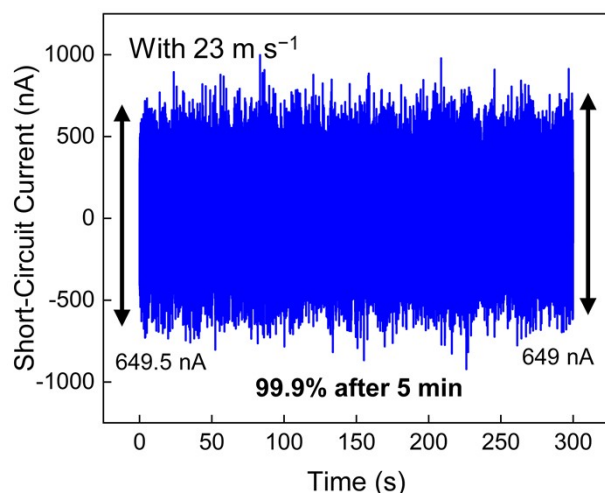

Fig. S8  $I_{SC}$  from the wind-TENG for the durability test during 5 min-injection of wind.

## 9. Wind sensing application with weak, middle, and strong-intensity

### (a) Wind velocity sensing application

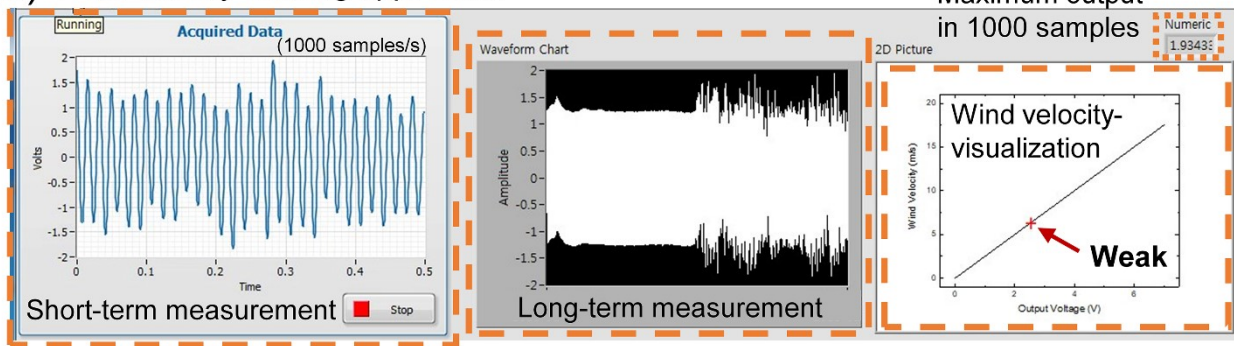

### (b)

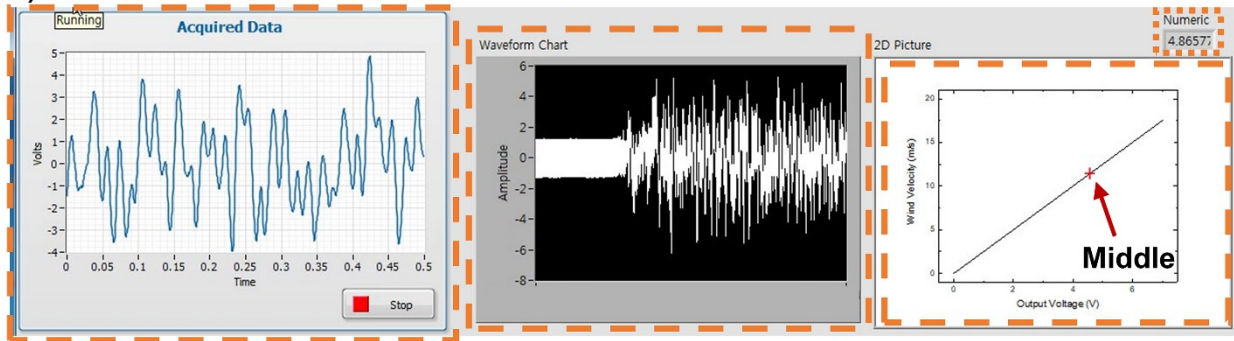

### (c)

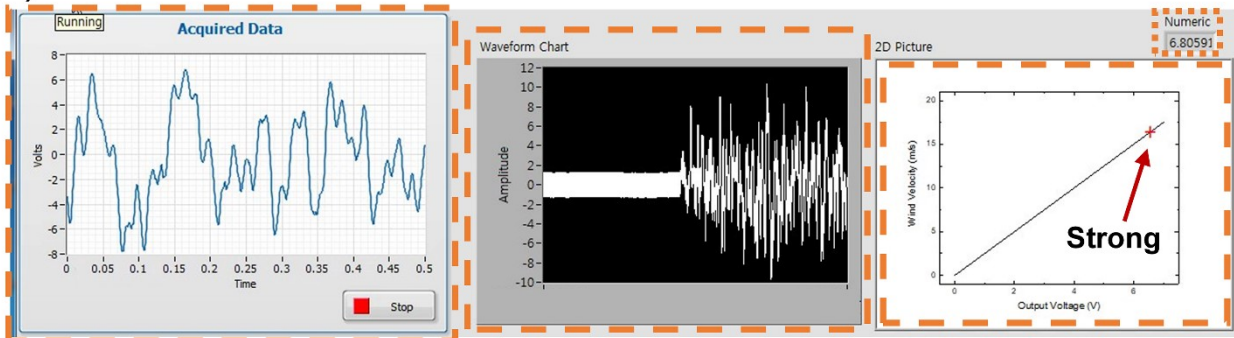

Fig. S9 Captured images of the wind sensing application with (a) weak, (b) middle, and (c) strong intensity of wind-input conditions.

#### **10. Video of wind sensing application with weak input**

Video 1 Wind velocity sensing test by wind TENG with weak input.

#### **11. Video of wind sensing application with middle input**

Video 2 Wind velocity sensing test by wind TENG with middle input.

#### **12. Video of wind sensing application with strong input**

Video 3 Wind velocity sensing test by wind TENG with strong input.
